# Supplementary material for: Systematic Identification of Protein Targets of Sub5 Using Saccharomyces cerevisiae Proteome Microarrays
Source: PubMed Central journal article supplement (PMC7828587; doi:10.3390/ijms22020760), 2021-01-13
Supplement: ijms-22-00760-s001.pdf [file ijms-22-00760-s001.pdf]

**Supplementary Table S1.** Two standard deviation (2SD) protein targets (i.e. 128 proteins)

of Sub-5 identified from *Saccharomyces cerevisiae* proteome microarrays. Protein with star mark (\*) denote ATP or ATP-dependent proteins.

|          |          |          |          |          |          |          |          |
|----------|----------|----------|----------|----------|----------|----------|----------|
| YOR239W  | YJR092W  | YGL153W  | YLR055C  | YLL048C* | YNL250W* | YGL207W  | YDR103W  |
| YCR088W  | YBL011W  | YBR296C  | YEL012W* | YER096W  | YKL052C  | YKL181W* | YNL245C  |
| YMR173W* | YMR311C  | YLR114C  | YJR072C* | YNR038W* | YJL107C  | YER095W* | YNL084C  |
| YBL047C  | YNL186W  | YDL153C  | YDR054C* | YBR288C  | YER118C  | YJL051W  | YEL056W  |
| YJL115W  | YKL028W* | YDR229W  | YLR196W  | YDL134C  | YPL071C  | YKL159C  | YKL074C  |
| YKL195W  | YCL054W  | YER116C  | YGL058W* | YJR049C* | YKR048C  | YAL003W  | YOR354C  |
| YIL138C  | YMR039C  | YJR125C  | YOL054W  | YJL123C  | YDR264C  | YIL154C  | YDR152W  |
| YLL008W* | YGR086C  | YMR091C* | YDR273W  | YGL161C  | YOL039W  | YLR340W  | YGL256W  |
| YDR068W  | YHR158C  | YGR202C  | YGR179C  | YGL130W  | YOR340C  | YNL175C  | YMR291W* |
| YML062C* | YLL026W  | YPL217C* | YCL029C  | YDR468C  | YDR346C  | YDR188W* | YBR092C  |
| YCL043C  | YLR295C* | YPL004C  | YLR435W  | YMR235C  | YPL023C  | YHR205W* | YER107C  |
| YJL020C  | YDL223C  | YIR006C  | YLR257W  | YGL134W  | YER030W  | YGR013W  | YMR074C  |
| YNL079C  | YFL034W  | YKL117W  | YDR168W  | YDR496C  | YER148W  | YNL099C  | YFR009W* |
| YPL190C  | YHR171W  | YJL098W  | YMR260C  | YPR152C  | YCR052W* | YKL073W* | YKL160W  |
| YKR090W  | YGL208W  | YDR382W  | YHR156C  | YGL073W  | YEL051W* | YAR014C  | YKL040C  |
| YFR015C  | YGL090W  | YIR003W  | YKL081W  | YGR187C  | YOR194C  | YJL065C* | YBL046W  |

Supplementary figure S1.

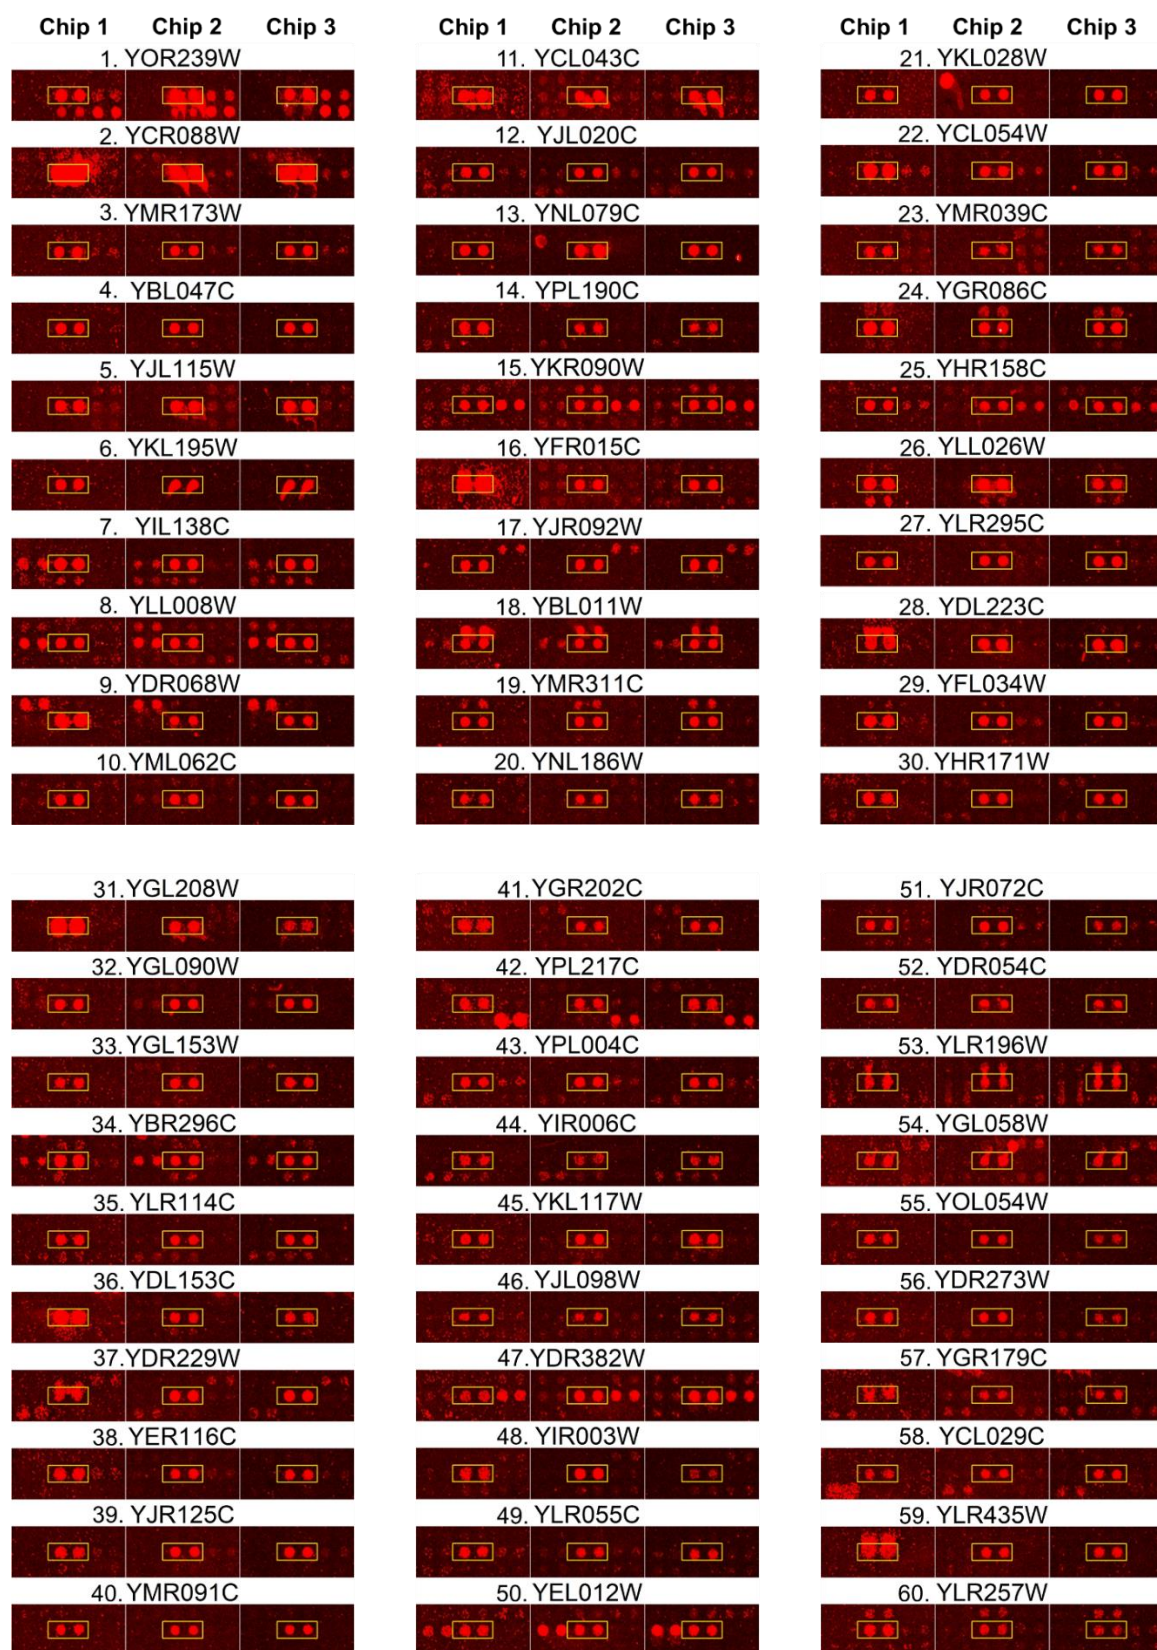



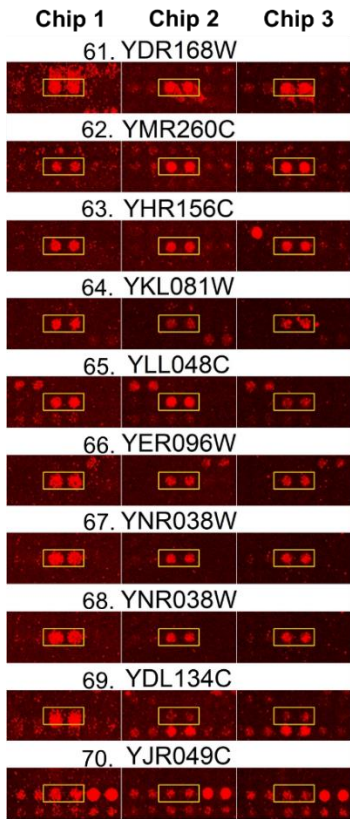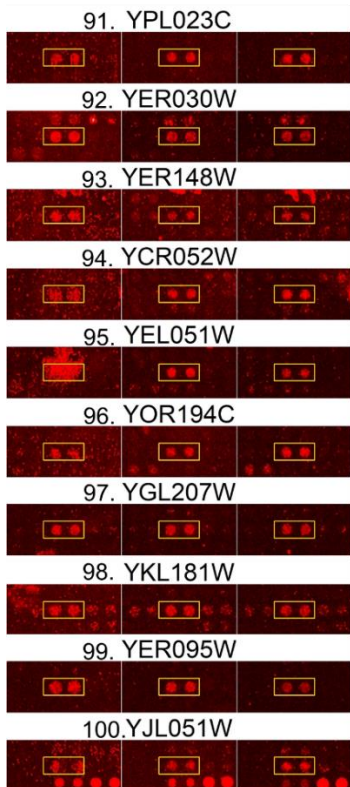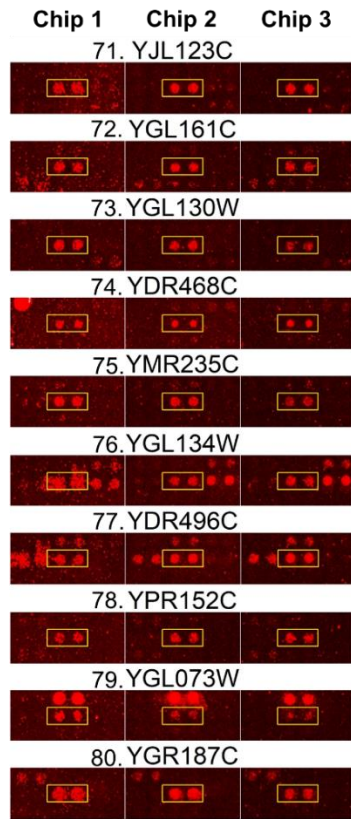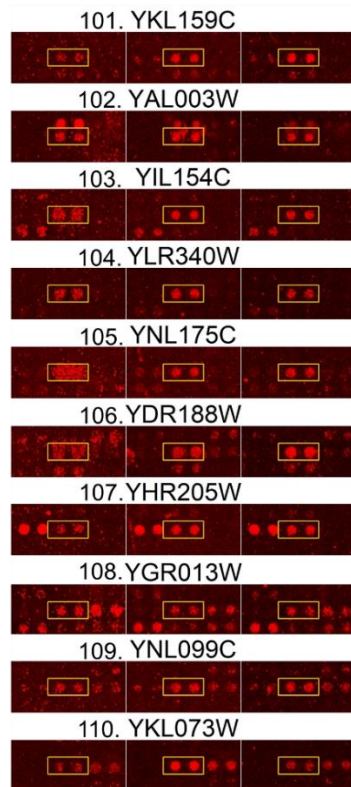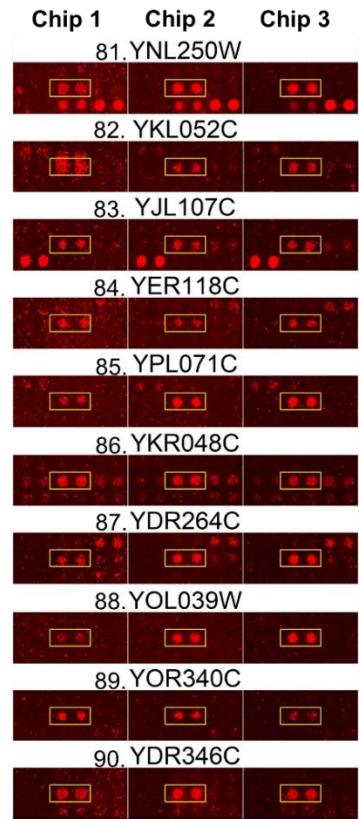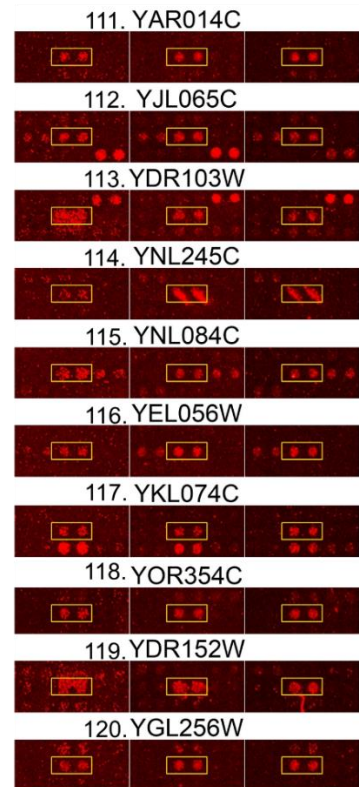

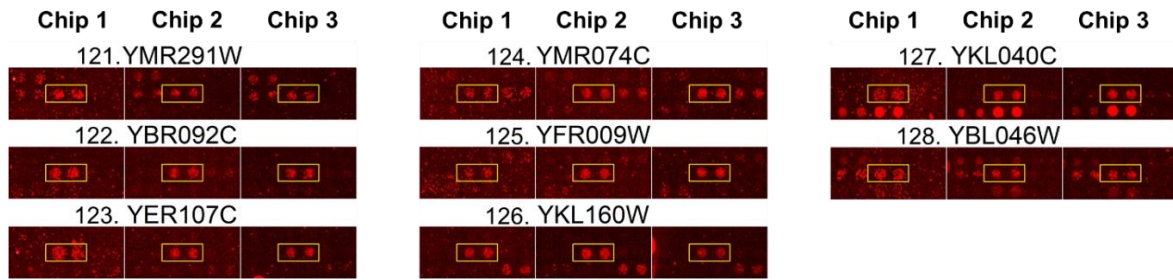

**Supplementary figure S1. Enlarged protein image of 128 protein targets of Sub-5 from the triplicate *Saccharomyces cerevisiae* proteome microarrays assay.** Individually enlarge image of 128 protein targets of Sub-5 identified from the triplicate *Saccharomyces cerevisiae* proteome microarrays assays. Each protein is spotted in duplicate on *Saccharomyces cerevisiae* proteome microarrays and *Saccharomyces cerevisiae* proteome microarrays assay of Sub-5 probing were performed in triplicate. Protein targets identification of Sub-5 were statistically analyses using several cutoff parameters and finally each protein was analyzed by eye-bowling to confirm obvious signal of these proteins on triplicate *Saccharomyces cerevisiae* proteome microarrays. Red spots represent signal of Sub-5 bound to immobilized *Saccharomyces cerevisiae* proteome

**Supplementary Table S2.** 75 protein targets of Sub-5 that have common motif identified

from MEME analysis

|         |         |         |         |         |
|---------|---------|---------|---------|---------|
| YJL123C | YDR068W | YIR006C | YOR194C | YDR054C |
| YPL190C | YKR048C | YML062C | YGL207W | YNR038W |
| YKL028W | YPL004C | YDR382W | YOR239W | YJL065C |
| YBL011W | YGR013W | YDR273W | YEL056W | YEL012W |
| YDL153C | YKL117W | YJL020C | YBL046W | YLR295C |
| YOL054W | YNL099C | YLR340W | YLR196W | YMR039C |
| YPR152C | YDR152W | YIL154C | YLR114C | YCR052W |
| YJL115W | YMR260C | YGL058W | YAL003W | YIL138C |
| YLL008W | YER030W | YDR103W | YMR091C | YGL090W |
| YGR187C | YJR125C | YJL098W | YGR202C | YMR311C |
| YMR235C | YOL039W | YGL073W | YCL043C | YER095W |
| YGR086C | YLR055C | YDR496C | YKL181W | YNL079C |
| YNL186W | YJR092W | YGR179C | YDR468C | YGL134W |
| YDR346C | YLR257W | YKL160W | YPL023C | YMR074C |
| YCR088W | YLR435W | YPL217C | YAR014C | YER116C |
